# Supplementary material for: Adjustment in third culture kids: A systematic review of literature
Source: Front Psychol. 2022 Nov 28;13:939044. doi: 10.3389/fpsyg.2022.939044 (PMC9743971; doi:10.3389/fpsyg.2022.939044)
Supplement: Supplementary file 2 [file Data_Sheet_2.xlsx]

## Sheet: Sheet1
CATEGORY	SUB CATEGORY	factors of adjustment	NUMBER OF PARTICIPANTS INVOLVED IN FINDING (total participants in analysis)	study #	GENDER	direction of association: P Positive, N Negative and 0 not significant	levels of significance per study	meaning of finding
demographic	age	age	178	3	MF	P	10 year old's had significantly higher optimism levels (M = 14.54, SD = 2.95) than 13/14 year old's (M = 12.57, SD = 3.70) / For happiness, results indicated that 10 year old's (M = 16.67, SD = 3.13) had significantly higher scores than 12 year old's (M = 14.47, SD = 3.54) / However, no other age groups statistically differed	younger children (10 years) are generally more happy and optimistic than 12-14 year old's (bigger risk for older TCK) / no difference for resilience
		age	39	10	MF	P	(r = 0.36, p < 0.01)	older teenagers are more likely to use an approach coping strategy
	gender	gender	178	3	F	P	school engagement behavior: females (M = 13.33, SD = 1.47) was significantly higher than in males (M = 12.70, SD = 1.28)	risk factor for student engagement: being male / no difference in for resilience or well being
		gender	39	10	F	p	(r = 0.29, p < 0.05)	females are more likely to use an approach coping strategy
		gender	116	5	MF	0		there is no significant difference in between males and females on the intercultural sensitivity score
	nationality	nationality Korean IM's vs non Korean IM's	116	5	MF	0	Korean students (M = 4.48, SD = .41) and non-Korean students (M = 4.68, SD = .44), t (137) = -2.52, p = .01, d = - 0.43. Cohen’s effect size value (d = -.43)	there is no significant difference in between Korean and non Korean on intercultural sensitivity
		nationality non US IM's vs US IM's	272 (792)	1	MF	P	Family Relationship, t(790) = - .307, p < .002; Travel Orientation, t(790) = - 2.493, p< .02; language Acceptance, t(790) = - 7.703.1, p< .001 ; Future orientation, t(790) = -4.266, p< .001, Stereotype scale t(790) = 2.237, p < .03	IM adolescents from other countries rate themselves closer to their families, more interested in travel, more accepting of learning languages, and more inclined towards international careers than did U.S. IM adolescents. Reversely, US IM adolescents rated more favorably on the stereotype scale than IM adolescents from other countries.
	mobility	time at school	178	3	MF	p	students at school since (6-12 months) had significantly lower engagement (M = 10.77, SD = 3.70) than those at the school for 2 years (M = 12.87, SD = 4.16) and resilience: students at the school for 6-12 months had significantly lower resilience than did those who had been at the school for 4+ years.	longer length of stay at school positively impacts well being and resilience
		time at international school	336	8	MF	P	Cognitive Adaptation ( r=0.16;p<0:01) Behavior Adaptation (r=0.12 p<0:05) Developmental Score (r=0:19; p<0:01)	the longer students spend at an international school, the lower their scores in the denial and defense stages of intercultural sensitivity.
		number of moves	178	3	MF	0		number of moves has no significant effect on resilience, well being and engagement
		time in country	178	3	MF	p	students in the 0-2 years had significantly lower resilience than those who had been there for 3-4 years	recent relocation to a new country affects student's ability to thrive (lower resilience / no effect on well being)
		international relocation (vs non international relocation)	882	6	MF	0		international versus non international relocation did not significantly contribute to the variance in personal adjustment, external adjustment or family relationships
environmental factors	expatriate work	support received by the company	104	9	MF	0		support from the company is unrelated to both quality of life and socio-cultural adjustment
		expatriate parent work satisfaction	104	9	MF	P	0,26 (intercultural adjustment / qual of life) and 0.31 (sociocultural adjustment)(p<0.01)	expatriate work satisfaction significantly predicts both quality of life and sociocultural adjustment in expatriate children
family factors	family demographics	number of younger siblings	240	4	MF	P	beta -0;20, t -3.43, p<0.01	fewer younger siblings is associated with better grades in American school
		number of older siblings	240	4	MF	p	beta 0.16, t 3.09, p<0.01	more older siblings is associated with higher levels of culture shock
	family functioning	family relationships	854	1	MF	0		no significant difference in between internationally mobile groups and comparison non-mobile group
		family orientation	62	7	MF	p	mean 4.27, SD 0.55, F 58.51, p<0.001	expatriate adolescents are closer to their family than their local counterparts in Hong Kong and GB
		family adaptability	104	9	MF	0	not significant in multiple regression, only inter variable correlation	significant raw correlation with quality of life
		family cohesion	104	9	MF	p	0,26 (intercultural adjustment / qual of life) and 0.38 (sociocultural adjustment)(p<0.01)	significant raw correlations with sociocultural adjustment and quality of life / family cohesion significantly predicts both quality of life and sociocultural adjustment in expatriate children
		family communication	104	9	MF	0	not significant in multiple regression, only inter variable correlation	significant raw correlation with quality of life
psychological	cognitive	flexibility	104	9	MF	0	positive correlation with quality of life and socio cultural adjustment. Not an independent predictor.	moderation effect : Flexibility was unrelated to sociocultural adjustment among individuals low in family adaptability whereas this trait was significantly related to sociocultural adjustment among individuals high in family adaptability. Flexibility helps in a family that adapts relatively easy to new circumstances, whereas it has no function in a family that has more difficulties with adaptatio…
		flexibility	62	7	MF	p	mean 4.11, SD 3.07, F 74.83, p<0.001	expatriate adolescents are more flexible than their local counterparts in Hong Kong and GB
		self concept	39	10	MF	0		no statistical significance in coping outcomes
		self efficacy	46	2	MF	P	X2 (4, N = 44) = 19.89, p < .01.	TCKs who indicated high levels of general self-efficacy were significantly more likely to report fewer difficulties in socio-cultural adaptation
		stereotyping	147 (494)	1	MF	P	Fr(2, 491) = 4.501, p < .02.	US adolescents in an international school in Egypt were significantly more accepting of other cultures (lower level of stereotypical judgement than their peers living in the US and in the International school in Thailand. This single effect is specific to expatriate adolescents living in Egypt.
	personality	open-mindedness towards other cultures	62	7	MF	p	mean 3.80, SD 0.62, p<0.01	expatriate adolescents are more open minded towards other cultures than their local counterparts in Hong Kong and GB
		open mindedness	104	9	MF	0	positive correlation with sociocultural adjustment and quality of life. Not an independent predictor (multiple regression) / moderation effect	open mindedness is found to moderate the relationship in between family adaptability, family cohesion, and support from the company in its influence on intercultural adjustment. It is correlated with quality of life and sociocultural adjustment, but not an independent predictor.
	attachment	ambivalent attachment style	104	9	MF	N	0,48 (intercultural adjustment / qual of life) and 0.42 (sociocultural adjustment)(p<0.01)	ambivalent attachment style significantly hinders both quality of life and sociocultural adjustment in expatriate children / moderation effect ambivalent attachment style interacted significantly with expatriate work satisfaction in its influence on quality of life
		secure attachment style	104	9	MF	0	positive correlation with quality of life and socio cultural adjustment. Not an independent predictor.	moderation effect: family- and work-related resources were solely related to children’s adjustment among children who are low in insecure attachment and high in secure attachment / interaction effect between the secure attachment style and family communication on quality of life, and between the same style and support from the company on adjustment was found.
		dismissive avoidant attachment style	104	9	MF	0	negative correlation with quality of life and socio cultural adjustment. Not an independent predictor.	dismissive avoidant attachment is correlated with but does not independently predict quality of life and socio cultural adjustment
	emotional	emotional stability	104	9	MF	P	0,32 (intercultural adjustment / qual of life) and 0.22 (sociocultural adjustment)(p<0.01)	emotional stability significantly predicts both quality of life and sociocultural adjustment in expatriate children / interaction effect (moderation) with expatriate work, family cohesion and family communication on sociocultural adjustment and quality of life
		repatriation anxiety (here about returning to japan)	240	4	MF	P	beta -0.24, t -4.22, p<0.01	less anxiety about returning to japan predicts better grades in the American school.
	behavioral	behavioral adjustment	39	10	MF	0		no statistical significance in coping outcomes
	social	respect and tolerance of others	63	7	MF	p	mean 4.09, SD 0.49, F 32.80, p<0.001	expatriate adolescents have more respect and tolerance of others than their local counterparts in Hong Kong and GB
		cultural empathy	104	9	MF	0		no correlation or significant prediction of sociocultural adjustment of quality of life.
		social initiative	104	9	MF	0	positive correlation with sociocultural adjustment and quality of life. Not an independent predictor (multiple regression) / moderation effect	Social Initiative moderates sociocultural adjustment and quality of life
	identity	own cultural identity	62	7	MF	p	mean 3.86, SD 0.61, F 11.14, p<0.001	expatriate adolescents have their own cultural identity which differs significantly from that of their local counterparts in Hong Kong and GB
sociocultural factors	relationships	perceived relationships with teachers (from international location)	240	4	MF	P	beta -0.28, t -4.71, p<0.01	better perceived relationships with American school teachers predict less culture shock
		Perceived peer relationships	46	2	MF	N negative association between friends and difficulties in socio-cultural adaptation	(rs (45) = -.42, p < .01)	this negative relationship speaks for a buffering potential of close friendships
		perceived relationship with local friends	240	4	MF	P	beta -0.31, t -5.36, p<0.01	better perceived relationships with American friends predict less culture shock
		usage of internet to connect with friends/family from around the world	46	2	MF	P	(U = 41.5, p < .05) (MR = 22.48, MR = 10.42)	TCKs who frequently utilize the world-wide web and make use of internet communities of other children and adolescents with similar multiple migration backgrounds to connect and maintain contacts are less likely to have difficulties in the adaptation process
	language	language proficiency level self reported (English by Japanese students)	240	4	MF	P	beta 0.34, t 5.79, p <0.01	better perceived proficiency in English positively predicts better grades in American school
		foreign language interest	62	7	MF	p	mean4.04, SD 0.50, F 33.13, p<0.001	expatriate adolescents have more interest in learning foreign languages than their local counterparts in Hong Kong and GB
		level of motivation for maintaining Japanese language skills	240	4	MF	p	beta 0.16, t 2.87, p<0,01	higher levels of motivation for maintaining home language (Japanese) reduces culture shock
		language acceptance	272 (494)	1	MF	P	F(2, 491) = 14.202, p < .001	US adolescents in international schools in Thailand and Egypt are significantly more interested in other languages than their peers living in the US. This effect is due to the International mobility factor rather than location because it affects both internationally mobile groups.
	culture	cultural acceptance	272 (494)	1	MF	P	F(2, 491) = 8. 773, p < .001	US adolescents in international schools in Thailand and Egypt are significantly more culturally accepting than their peers living in the US. Authors conclude that this effect is due to the International mobility factor rather than location because it affects both internationally mobile groups.
	international mobility	international career preference	62	7	MF	p	mean 4.31, SD 0.52, F 72.97, p<0.001	expatriate adolescents will prefer an international career above their local counterparts in Hong Kong and GB
		international travel preference	62	7	MF	p	mean 4.47, SD 0.49, D 58.71, p<0.001	expatriate adolescents will prefer to travel above their local counterparts in Hong Kong and GB
		travel orientation	272 (494)	1	MF	P	F(2 , 491) = 16.024, p < .001	US adolescents in international schools in Thailand and Egypt are significantly more keen on travelling than their peers living in the US. This effect is due to the International mobility factor rather than location because it affects both internationally mobile groups.
		settling down preference	62	7	MF	n	mean 2.47, SD 0.80, F 7.40, p<0.001	expatriate adolescents are less keen on settling down in one place than their local counterparts in Hong Kong and GB
		future orientation (international)	272 (494)	1	MF	P	F(2, 491) = 34.679, p <.001	US adolescents in international schools in Thailand and Egypt are significantly more orientated toward living and working abroad in the future than their peers living in the US. This effect is due to the International mobility factor rather than location because it affects both internationally mobile groups.
	academic factors	grades in Japanese supplementary school	240	4	MF	P	beta 0.15, t 2.64, p<0.01	better grades in Japanese supplementary school significantly predict grades in American school
		perceived ease of completing homework	240	4	MF	p	beta -0.26, t -4.53, p<0.01	better perceived ease with completing homework from school in international location significantly decreases culture shock
							ARTICLE IN PRESS
